# Supplementary material for: Contributions of suboolemmal acidic vesicles and microvilli to the intracellular Ca2+ increase in the sea urchin eggs at fertilization
Source: PubMed Central journal article supplement — Int J Biol Sci. 2019 Jan 29;15(4):757–75. doi: 10.7150/ijbs.28461 (PMC6429021; doi:10.7150/ijbs.28461), 2019-01-29
Supplement: ijbsv15p0757s1.pdf [file ijbsv15p0757s1.pdf]

**Supplementary data S1. Instantaneous  $\text{Ca}^{2+}$  spots in the cortical region of live starfish and sea urchin eggs induced by the GPN.** Transmission light and pseudocolor images taken with the CCD camera showing the *A. aranciacus* and *P. lividus* eggs 10-20 minutes after the exposure to GPN. **(A)**  $\text{Ca}^{2+}$  bursts in starfish eggs after their incubation in the presence of 500  $\mu\text{M}$  GPN. **(B)** Sea urchin egg with visible  $\text{Ca}^{2+}$  puffs during the exposure to 200  $\mu\text{M}$  GPN. Arrows indicate the spots of the instantaneous  $\text{Ca}^{2+}$  release in the eggs.

**Supplementary data S2. Effect of the GPN treatment on the FE in fertilized sea urchin eggs.** *P. lividus* eggs were observed with SEM 10 minutes after fertilization. Upper panel shows the flat surface of the elevated FE in the DMSO-pretreated control egg. Lower panel shows multiple cracks (arrow) on the FE caused by the GPN pretreatment (200  $\mu\text{M}$ , 40 min).

**A**

**GPN 500  $\mu$ M**

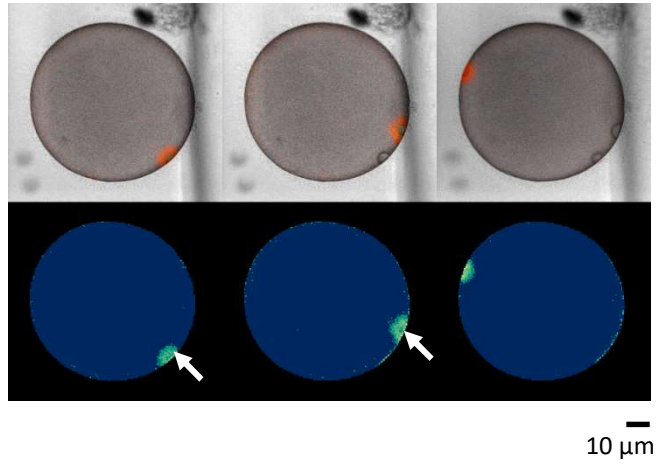

**B**

**GPN 200  $\mu$ M**

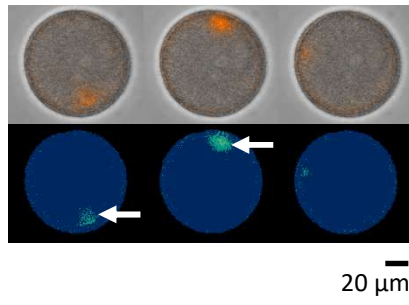

**Supplementary data S1.**

**Inseminated**

**DMSO**

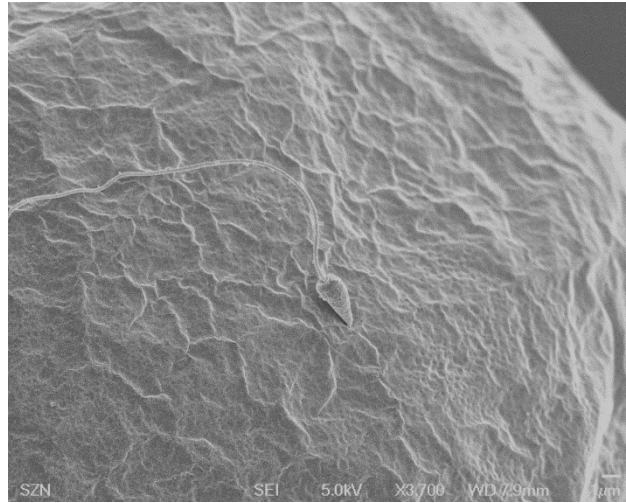

**GPN 200 µM**

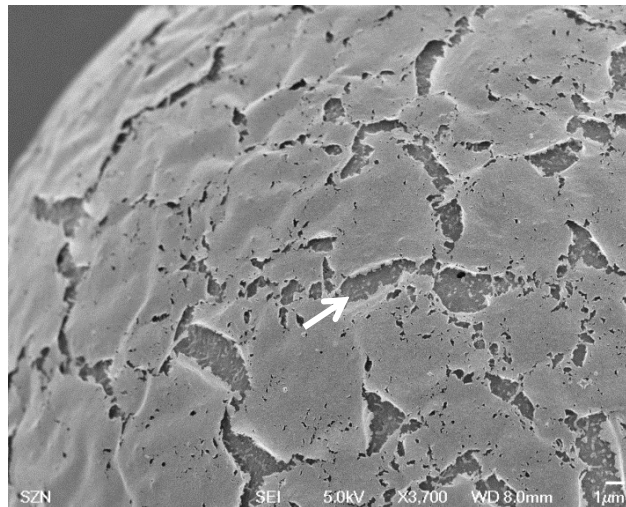

**1 µm**
